# Supplementary material for: A combined spatial score of granzyme B and CD68 surpasses CD8 as an independent prognostic factor in TNM stage II colorectal cancer
Source: Research Square preprint supplement (doi:10.21203/rs.3.rs-1450580/v1), 2022-04-06
Supplement: Supplementary file 1 [file 0b0b4ec14d4255a7d6f5a211.docx]

|  |  | Centre | | |  | | Front | | | |  | | Microenvironment | | | | |
| --- | --- | --- | --- | --- | --- | --- | --- | --- | --- | --- | --- | --- | --- | --- | --- | --- | --- |
|  |  | HR | 95% CI | p | |  | | HR | 95% CI | p | |  | | HR | 95% CI | p |
| TP10μm | CD8 | 0.13 | 0.05-0.35 | <0.001*** | |  | | 0.25 | 0.11-0.59 | 0.002** | |  | | 0.48 | 0.21-1.06 | 0.069 |
| GZMB | 0.15 | 0.06-0.39 | <0.001*** | |  | | 0.38 | 0.16-0.91 | 0.03* | |  | | 0.37 | 0.16-0.88 | 0.025* |
| CD68 | 0.35 | 0.15-0.79 | 0.012* | |  | | 0.59 | 0.27-1.29 | 0.187 | |  | | 0.83 | 0.39-1.78 | 0.631 |
| CD163 | 0.53 | 0.25-1.14 | 0.105 | |  | | 0.99 | 0.45-2.18 | 0.987 | |  | | 0.56 | 0.25-1.26 | 0.162 |
| TP25μm | CD8 | 0.18 | 0.07-0.45 | <0.001*** | |  | | 0.32 | 0.14-0.73 | 0.006** | |  | | 0.57 | 0.26-1.24 | 0.156 |
| GZMB | 0.16 | 0.06-0.42 | <0.001*** | |  | | 0.34 | 0.14-0.82 | 0.017* | |  | | 0.45 | 0.2-1.04 | 0.062 |
| CD68 | 0.21 | 0.08-0.51 | <0.001*** | |  | | 0.56 | 0.26-1.22 | 0.144 | |  | | 0.59 | 0.27-1.3 | 0.191 |
| CD163 | 0.41 | 0.18-0.89 | 0.025* | |  | | 0.85 | 0.39-1.86 | 0.681 | |  | | 0.54 | 0.24-1.2 | 0.131 |
| TP50μm | CD8 | 0.24 | 0.1-0.56 | <0.001*** | |  | | 0.29 | 0.13-0.66 | 0.003** | |  | | 0.46 | 0.21-1.03 | 0.059 |
| GZMB | 0.12 | 0.04-0.34 | <0.001*** | |  | | 0.34 | 0.14-0.81 | 0.015* | |  | | 0.43 | 0.19-1 | 0.05 |
| CD68 | 0.25 | 0.11-0.59 | 0.002** | |  | | 0.46 | 0.21-1.01 | 0.053 | |  | | 0.49 | 0.22-1.09 | 0.08 |
| CD163 | 0.42 | 0.19-0.92 | 0.03* | |  | | 0.74 | 0.34-1.63 | 0.454 | |  | | 0.52 | 0.23-1.17 | 0.113 |
| TP100μm | CD8 | 0.24 | 0.1-0.57 | 0.001** | |  | | 0.36 | 0.16-0.81 | 0.013* | |  | | 0.36 | 0.16-0.83 | 0.016* |
| GZMB | 0.13 | 0.04-0.37 | <0.001*** | |  | | 0.38 | 0.17-0.89 | 0.026* | |  | | 0.32 | 0.14-0.77 | 0.011* |
| CD68 | 0.29 | 0.12-0.68 | 0.004** | |  | | 0.44 | 0.2-0.98 | 0.043* | |  | | 0.63 | 0.29-1.37 | 0.244 |
| CD163 | 0.4 | 0.18-0.88 | 0.023* | |  | | 0.61 | 0.27-1.36 | 0.228 | |  | | 0.55 | 0.24-1.23 | 0.146 |
| Total Stroma | CD8 | 0.23 | 0.1-0.54 | <0.001*** | |  | | 0.31 | 0.13-0.7 | 0.005** | |  | | 0.43 | 0.2-0.97 | 0.042* |
| GZMB | 0.13 | 0.04-0.37 | <0.001*** | |  | | 0.25 | 0.1-0.62 | 0.003** | |  | | 0.25 | 0.1-0.62 | 0.003** |
| CD68 | 0.3 | 0.13-0.7 | 0.005** | |  | | 0.35 | 0.15-0.79 | 0.012* | |  | | 0.63 | 0.29-1.37 | 0.244 |
| CD163 | 0.4 | 0.18-0.89 | 0.024* | |  | | 0.65 | 0.29-1.46 | 0.298 | |  | | 0.64 | 0.29-1.42 | 0.272 |

| HR < 0.2 |
| --- |
| 0.2 < HR < 0.3 |
| 0.3 < HR < 0.4 |
| 0.4 < HR < 0.5 |
| 0.5 < HR |
