# Supplementary material for: A combined spatial score of granzyme B and CD68 surpasses CD8 as an independent prognostic factor in TNM stage II colorectal cancer
Source: Research Square preprint supplement (doi:10.21203/rs.3.rs-1450580/v1), 2022-04-06
Supplement: Supplementary file 2 [file 4b88367644219234ddc8b84a.docx]

|  |  | Model CD8 | | |  | Model GZMB/CD68 | | |
| --- | --- | --- | --- | --- | --- | --- | --- | --- |
|  |  | HR | 95% CI | p |  | HR | 95% CI | p |
| Cohort 1  *(TNM I-IV)* | TNM (I-IV) | 1.639 | 1.10-2.43 | **0.014*** |  | 1.556 | 1.05-2.31 | **0.028*** |
| Postoperative Tx (no/yes) | 0.62 | 0.25-1.51 | 0.292 |  | 0.635 | 0.26-1.57 | 0.325 |
| CD8 (low/high) | 0.232 | 0.09-0.58 | **0.002**** |  |  |  |  |
| GZMB/CD68 (low/high) | |  |  |  | 0.063 | 0.01-0.47 | **0.007**** |
|  |  | |  |  |  |  |  |  |
|  |  |  |  |  |  |  |  |  |
| Cohort 2  *(TNM II)* | pT (3/4) | 2.331 | 1.04-5.22 | **0.04*** |  | 2.165 | 0.97-4.83 | 0.059 |
| Venous invasion (no/yes) | 1.119 | 0.42-2.99 | 0.822 |  | 0.992 | 0.37-2.65 | 0.987 |
| CD8 (low/high) | 0.571 | 0.27-1.21 | 0.142 |  |  |  |  |
| GZMB/CD68 (low/high) | |  |  |  | 0.181 | 0.06-0.60 | **0.005**** |
